# Supplementary material for: Intraocular Pressure Variations in Postural Changes: Comparison between Obese and Non-Obese Controls
Source: MDPI journal article supplement (doi:10.3390/jcm12185883), 2023-09-10
Supplement: s1 [file s1]

**Supplementary Table S1.** Comparison of Intraocular Pressure Variations detected in different positions both in female obese subjects and in female non-obese controls.

| Parameter                                                                             | $\Delta$ IOP<br>Supine/<br>Standing 5' | $\Delta$ IOP<br>Supine/<br>Sitting | $\Delta$ IOP<br>Supine/<br>Immediately<br>Standing | $\Delta$ IOP Supine 5'/<br>Standing 5' | $\Delta$ IOP<br>Supine 5'/<br>Sitting | $\Delta$ IOP<br>Supine 5'/<br>Immediately<br>Standing |
|---------------------------------------------------------------------------------------|----------------------------------------|------------------------------------|----------------------------------------------------|----------------------------------------|---------------------------------------|-------------------------------------------------------|
| <b><math>\Delta</math>IOP in different Positions – Female Obese Subjects (64)</b>     |                                        |                                    |                                                    |                                        |                                       |                                                       |
| Mean $\pm$ SD                                                                         | 1.56 $\pm$ 2.24mmHg                    | 1.53 $\pm$ 2.20mmHg                | 1.84 $\pm$ 2.60mmHg                                | 1.50 $\pm$ 2.14mmHg                    | 1.47 $\pm$ 2.71mmHg                   | 1.78 $\pm$ 2.08mmHg                                   |
| CI 95%                                                                                | 1.00-2.12mmHg                          | 0.86-2.20mmHg                      | 1.19-2.49mmHg                                      | 0.97-2.03mmHg                          | 0.79-2.15mmHg                         | 1.26-2.30mmHg                                         |
| Median                                                                                | 1.00mmHg                               | 1.00mmHg                           | 2.00mmHg                                           | 2.00mmHg                               | 2.00mmHg                              | 2.00mmHg                                              |
| Min/Max                                                                               | -3.00/9.00mmHg                         | -7.00/10.00mmHg                    | -2.00/10.00mmHg                                    | -3.00/6.00mmHg                         | -9.00/8.00mmHg                        | -1.00/7.00mmHg                                        |
| IQR                                                                                   | 3.00mmHg                               | 3.00mmHg                           | 3.00mmHg                                           | 3.00mmHg                               | 3.00mmHg                              | 3.00mmHg                                              |
| KS                                                                                    | 0.243                                  | 0.079                              | 0.247                                              | 0.138                                  | 0.089                                 | 0.325                                                 |
| <b><math>\Delta</math>IOP in different Positions – Female Non-obese Controls (38)</b> |                                        |                                    |                                                    |                                        |                                       |                                                       |
| Mean $\pm$ SD                                                                         | 0.81 $\pm$ 1.85mmHg                    | 1.26 $\pm$ 1.56mmHg                | 1.38 $\pm$ 2.00mmHg                                | 1.00 $\pm$ 1.95mmHg                    | 1.45 $\pm$ 1.67mmHg                   | 1.57 $\pm$ 1.86mmHg                                   |
| CI                                                                                    | 0.20-1.26mmHg                          | 0.77-1.75mmHg                      | 0.76-2.00mmHg                                      | 0.39-1.61mmHg                          | 0.93-1.97mmHg                         | 0.99-2.15mmHg                                         |
| Median                                                                                | 1.00mmHg                               | 1.00mmHg                           | 1.00mmHg                                           | 1.00mmHg                               | 1.00mmHg                              | 1.00mmHg                                              |
| Min/Max                                                                               | -3.00/5.00mmHg                         | -3.00/5.00mmHg                     | -3.00/5.00mmHg                                     | -3.00/6.00mmHg                         | -2.00/4.00mmHg                        | -3.00/6.00mmHg                                        |
| IQR                                                                                   | 3.00mmHg                               | 2.00mmHg                           | 2.00mmHg                                           | 2.00mmHg                               | 3.00mmHg                              | 3.00mmHg                                              |
| KS                                                                                    | 0.169                                  | 0.166                              | 0.162                                              | 0.146                                  | 0.119                                 | 0.128                                                 |
| $\Delta$ IOP Patients<br>– $\Delta$ IOP controls                                      | 0.75mmHg                               | 0.27mmHg                           | 0.46mmHg                                           | 0.50mmHg                               | 0.02mmHg                              | 0.21mmHg                                              |
| P                                                                                     | <b>0.043</b>                           | 0.325                              | 0.279                                              | 0.067                                  | 0.496                                 | 0.314                                                 |

$\Delta$ IOP = Intraocular Pressure Variation; SD = Standard Deviation; CI 95% = 95% Confidence Interval; Min/Max error = Minimum and Maximum Error; IQR = Interquartile Range; P Value of Exact Kolmogorov Smirnov Test; P = level of significance obtained by Mann-Whitney U Test.

**Supplementary Table S2.** Comparison of Intraocular Pressure Variations detected in different positions both in male obese subjects and in male non-obese controls.

| Parameter                                                                           | $\Delta$ IOP<br>Supine/<br>Standing 5' | $\Delta$ IOP<br>Supine/<br>Sitting | $\Delta$ IOP<br>Supine/<br>Immediately<br>Standing | $\Delta$ IOP Supine 5'/<br>Standing 5' | $\Delta$ IOP<br>Supine 5'/<br>Sitting | $\Delta$ IOP<br>Supine 5'/<br>Immediately<br>Standing |
|-------------------------------------------------------------------------------------|----------------------------------------|------------------------------------|----------------------------------------------------|----------------------------------------|---------------------------------------|-------------------------------------------------------|
| <b><math>\Delta</math>IOP in different Positions – Male Obese Subjects (28)</b>     |                                        |                                    |                                                    |                                        |                                       |                                                       |
| Mean $\pm$ SD                                                                       | 1.86 $\pm$ 2.32mmHg                    | 1.79 $\pm$ 3.07mmHg                | 1.82 $\pm$ 2.16mmHg                                | 2.39 $\pm$ 3.35mmHg                    | 2.32 $\pm$ 3.74mmHg                   | 2.36 $\pm$ 2.41mmHg                                   |
| CI 95%                                                                              | 0.96-2.76mmHg                          | 0.59-2.98mmHg                      | 0.98-2.66mmHg                                      | 1.09-3.69mmHg                          | 0.87-3.77mmHg                         | 1.42-3.29mmHg                                         |
| Median                                                                              | 1.00mmHg                               | 1.50mmHg                           | 1.50mmHg                                           | 1.50mmHg                               | 2.00mmHg                              | 2.00mmHg                                              |
| Min/Max                                                                             | -3.00/7.00mmHg                         | -3.00/10.00mmHg                    | -2.00/7.00mmHg                                     | -2.00/8.00mmHg                         | -4.00/8.00mmHg                        | -1.00/7.00mmHg                                        |
| IQR                                                                                 | 4.00mmHg                               | 3.00mmHg                           | 3.00mmHg                                           | 4.00mmHg                               | 5.00mmHg                              | 4.00mmHg                                              |
| KS                                                                                  | 0.243                                  | 0.079                              | 0.247                                              | 0.138                                  | 0.089                                 | 0.325                                                 |
| <b><math>\Delta</math>IOP in different Positions – Male Non-obese Controls (10)</b> |                                        |                                    |                                                    |                                        |                                       |                                                       |
| Mean $\pm$ SD                                                                       | -0.10 $\pm$ 1.52mmHg                   | 1.30 $\pm$ 1.25mmHg                | 1.30 $\pm$ 0.94mmHg                                | 0.00 $\pm$ 1.63mmHg                    | 1.40 $\pm$ 1.27mmHg                   | 1.40 $\pm$ 0.84mmHg                                   |
| CI                                                                                  | -1.19-0.99mmHg                         | 0.40-2.20mmHg                      | 0.62-1.98mmHg                                      | -1.17-1.17mmHg                         | 0.50-2.30mmHg                         | 0.80-2.00mmHg                                         |
| Median                                                                              | -0.50mmHg                              | 1.00mmHg                           | 1.00mmHg                                           | 0.00mmHg                               | 1.00mmHg                              | 1.00mmHg                                              |
| Min/Max                                                                             | -2.00/2.00mmHg                         | -1.00/3.00mmHg                     | 0.00/3.00mmHg                                      | -3.00/2.00mmHg                         | 0.00/4.00mmHg                         | 0.00/3.00mmHg                                         |
| IQR                                                                                 | 3.00mmHg                               | 2.00mmHg                           | 1.00mmHg                                           | 3.00mmHg                               | 2.00mmHg                              | 1.00mmHg                                              |
| KS                                                                                  | 0.202                                  | 0.219                              | 0.245                                              | 0.361                                  | 0.611                                 | 0.523                                                 |
| $\Delta$ IOP Patients<br>– $\Delta$ IOP controls                                    | 1.96mmHg                               | 0.49mmHg                           | 0.52mmHg                                           | 2.39mmHg                               | 0.92mmHg                              | 0.96mmHg                                              |
| P                                                                                   | <b>0.009</b>                           | 0.361                              | 0.335                                              | <b>0.016</b>                           | 0.231                                 | 0.178                                                 |

$\Delta$ IOP = Intraocular Pressure Variation; SD = Standard Deviation; CI 95% = 95% Confidence Interval; Min/Max error = Minimum and Maximum Error; IQR = Interquartile Range; P Value of Exact Kolmogorov Smirnov Test; P = level of significance obtained by Mann-Whitney U Test.
